# Supplementary material
Source: HighWire-hosted journal article supplement (https://bmjopen.bmj.com/content/13/10/e065295)
Supplement: inline-supplementary-material-1 [file inline-supplementary-material-1.pdf]

Table legend

Table 1: Definition of early and late treatment failures

Table 2: Study visit schedule

Table 1: Definition of early and late treatment failures

| Early treatment failure (ETF)                                                                       | Late treatment failure (LTF)                                                                                                                                                                                 |
|-----------------------------------------------------------------------------------------------------|--------------------------------------------------------------------------------------------------------------------------------------------------------------------------------------------------------------|
| one of the following                                                                                |                                                                                                                                                                                                              |
| 1) Development of danger signs or severe malaria on Days 0-3 with parasitaemia                      | Late Clinical Failure (LCF):<br>1) Development of danger signs or severe malaria on any day after Day 3 in the presence of parasitaemia, without having previously met any of the ETF criteria;              |
| 2) Presence of parasitaemia on Day 3 with fever (axillary temperature $\geq 37.5^{\circ}\text{C}$ ) | 2) Presence of parasitaemia and fever on any day after Day 3, without having previously met the ETF criteria.                                                                                                |
|                                                                                                     | Late parasitological failure (LPF):<br>Presence of parasitaemia on any day, starting on Day 7, and axillary temperature $<37.5^{\circ}\text{C}$ , without previously meeting any of the ETF or LCF criteria. |



**Table 2: Study visit schedule**

| Day                              | 0 | 1 | 2 | 3 | 7(± 1)         | 14 (± 1) | 21 (± 2) | 28 (± 2) | 35 (± 3) | 42 (± 3) | 49-56 (± 3) | 63 (± 3) | Any other day <sup>1</sup> | Delivery       | 4-6 weeks post-end of pregnancy | 1-year post-end of pregnancy |
|----------------------------------|---|---|---|---|----------------|----------|----------|----------|----------|----------|-------------|----------|----------------------------|----------------|---------------------------------|------------------------------|
| History (symptoms)               | X | X | X | X | X              | X        | X        | X        | X        | X        | X           | X        | X                          |                |                                 |                              |
| Informed consent                 | X |   |   |   |                |          |          |          |          |          |             |          |                            |                |                                 |                              |
| Examination (clinical)           | X | X | X | X | X              | X        | X        | X        | X        | X        | X           | X        | X                          | X              |                                 |                              |
| Vital signs                      | X | X | X | X | X              | X        | X        | X        | X        | X        | X           | X        | X                          | X              |                                 |                              |
| Foetal viability                 | X |   |   | X | X              | X        | X        | X        | X        | X        | X           | X        | X                          |                |                                 |                              |
| Blood Pressure                   | X | X | X | X | X              | X        | X        | X        | X        | X        | X           | X        | X                          | X              |                                 |                              |
| Body Temperature                 | X | X | X | X | X              | X        | X        | X        | X        | X        | X           | X        | X                          | X              |                                 |                              |
| ECG                              | X |   | X |   | X <sup>2</sup> |          |          |          |          |          |             |          |                            |                |                                 |                              |
| Blood slide <sup>3</sup>         | X | X | X | X | X              | X        | X        | X        | X        | X        | X           | X        | X                          | X              |                                 |                              |
| Filter paper for genotyping      | X | X | X | X | X              | X        | X        | X        | X        | X        | X           | X        | X                          | X              |                                 |                              |
| Adverse drug reactions           | X | X | X | X | X              | X        | X        | X        | X        | X        | X           | X        | X                          | X              | X                               |                              |
| Concomitant medications          | X | X | X | X | X              | X        | X        | X        | X        | X        | X           | X        | X                          | X              | X                               |                              |
| Haematology                      | X |   |   |   | X              | X        |          | X        |          | X        |             | X        | X                          | X <sup>6</sup> |                                 |                              |
| Treatment administration         | X | X | X |   |                |          |          |          |          |          |             |          |                            |                |                                 |                              |
| Blood sample for PK <sup>4</sup> | X | X | X |   | X              | X        | X        | X        |          | X        |             |          |                            |                |                                 |                              |
| Biochemistry <sup>5</sup>        | X | X |   |   | X              |          |          |          |          |          |             |          |                            |                |                                 |                              |
| Urine analysis                   | X |   |   |   |                |          |          | X        |          | X        |             | X        |                            |                |                                 |                              |
| Placenta biopsy                  |   |   |   |   |                |          |          |          |          |          |             |          |                            | X              |                                 |                              |
| Newborn Assessment               |   |   |   |   |                |          |          |          |          |          |             |          |                            | X <sup>8</sup> | X                               |                              |
| Newborn LFT                      |   |   |   |   |                |          |          |          |          |          |             |          |                            | X <sup>7</sup> |                                 |                              |
| Infant assessment                |   |   |   |   |                |          |          |          |          |          |             |          |                            |                |                                 | X                            |

<sup>1</sup>Spontaneous attendance to the health facility (unscheduled visit); <sup>2</sup>ECG at Day 7 if abnormal at Day 2; <sup>3</sup>Thick and thin blood film; <sup>4</sup>Four blood samples at scheduled times, first sampling before treatment administration; <sup>5</sup>In the event of increased LFTs >3xULN, the result will be verified by taking a further sample for analysis as soon as possible (within 24 hours of the original sample). Subsequent blood samples for LFTs will be taken at 48-hour intervals until the results return to ≤2xULN; <sup>6</sup>Only Hb; <sup>7</sup>If delivery within or 2 weeks after the active follow up; <sup>8</sup>Blood sample collected systematically for dried blood spots, blood slide and Hb.
